# Supplementary material for: GEM-MACH-PAH (rev2488): a new high-resolutionchemical transport model for North American PAHsand benzene
Source: Copernicus journal article supplement (doi:10.5194/gmd-2017-324), 2018-01-31
Supplement: Supplementary file [file gmd-2017-324-AC1-supplement.pdf]

GEM-MACH-PAH: a new high-resolution chemistry transport model for North American PAHs  
and benzene

Cynthia H. Whaley, Elisabeth Galarneau, Paul A. Makar, Ayodeji Akingunola, Wanmin  
Gong, Sylvie Gravel, Michael D. Moran, Craig Stroud, Junhua Zhang, and Qiong Zheng

SUPPLEMENTAL MATERIAL

CONTENTS

|                                                                     |    |
|---------------------------------------------------------------------|----|
| Appendix A: Measurement Sites .....                                 | 2  |
| Appendix B: Gas-particle partitioning analysis .....                | 6  |
| B.1: Discussion of Junge-Pankow .....                               | 6  |
| B: Derivation of $m = -1$ for Junge-Pankow .....                    | 8  |
| B.2: Derivation of new $K_{SW}$ for Dachs-Eisenreich scheme .....   | 9  |
| Appendix C: Verification of PAH mobile EFs from other sources ..... | 11 |
| Appendix D: Species-specific constants needed for scavenging .....  | 12 |
| Appendix E: Call sequence of CHEM code for GEM-MACH-PAH .....       | 13 |
| Appendix F: Additional Hamilton Analysis .....                      | 14 |
| References .....                                                    | 15 |

## Appendix A: Table of measurement sites

**Table A.1:** Benzene and PAH network measurement sites in the Pam Am model domain. The following codes are used in the “measurement” column: “PB”=PAHs and benzene measured; “justP”=only PAHs measured; “justB”=only benzene measured; and “wetdep”=wet deposition measured.

Note that NATTS have site IDs, but not names, therefore the first column provides the state where the particular site resides, and cities/towns were manually looked up and added for those sites that have PAH measurements.

| Site name or State                    | Site ID   | Latitude | Longitude | measurement  |
|---------------------------------------|-----------|----------|-----------|--------------|
| <b>IADN sites</b>                     |           |          |           |              |
| University of Toronto, ON             | UOT       | 43.8725  | -79.18833 | wetdep       |
| St Clair, ON                          | STC       | 42.53594 | -82.38978 | wetdep       |
| Burlington, ON                        | BUR       | 43.36889 | -79.87028 | wetdep       |
| Burnt Island, ON                      | BNT       | 45.82833 | -82.94806 | justP        |
| Point Petre, ON                       | PPT       | 43.84278 | -77.15361 | justP/wetdep |
| Sturgeon Point, NY                    | STP       | 42.69306 | -79.055   | justP/wetdep |
| Cleveland, OH                         | CLV       | 41.49214 | -81.67853 | justP/wetdep |
| Sleeping Bear Dunes, MI               | SBD       | 44.76111 | -86.0586  | justP        |
| Chicago IIT, IL                       | IIT       | 41.83444 | -87.6247  | justP        |
| <b>NAPS sites</b>                     |           |          |           |              |
| College and South, Windsor, ON        | 60211     | 42.29289 | -83.0731  | PB           |
| Gage Institute, Toronto, ON           | 60427     | 43.65822 | -79.3972  | PB           |
| Etobicoke South (Toronto Kipling), ON | 60435     | 43.61076 | -79.5219  | PB           |
| Elgin and Kelly, Hamilton, ON         | 60512     | 43.25778 | -79.8617  | PB           |
| Experimental Farm, Simcoe, ON         | 62601     | 42.8569  | -80.2703  | PB           |
| Egbert, ON                            | 64401     | 44.23111 | -79.7831  | PB           |
| Point Petre, ON                       | 64601     | 43.84278 | -77.1536  | PB           |
| Burnt Island, ON                      | 65501     | 45.82833 | -82.9481  | PB           |
| <b>NATTS sites</b>                    |           |          |           |              |
| Middletown, OH                        | 390170003 | 39.4938  | -84.3543  | justB        |
| OH                                    | 390350038 | 41.47701 | -81.6824  | justB        |
| OH                                    | 390350068 | 41.45478 | -81.6344  | justB        |
| OH                                    | 390350069 | 41.519   | -81.6378  | justB        |
| OH                                    | 390350071 | 41.49251 | -81.67    | justB        |
| OH                                    | 390490034 | 40.00274 | -82.9944  | justB        |
| OH                                    | 390515502 | 41.55002 | -84.1365  | justB        |
| OH                                    | 390610014 | 39.19433 | -84.479   | justB        |
| OH                                    | 390610044 | 39.13837 | -84.7116  | justB        |
| OH                                    | 390610045 | 39.17093 | -84.5287  | justB        |

|                      |           |          |          |        |
|----------------------|-----------|----------|----------|--------|
| OH                   | 390610046 | 39.11412 | -84.5363 | justB  |
| OH                   | 390810017 | 40.36644 | -80.6156 | justB  |
| Ironton, OH          | 390875503 | 38.51814 | -82.6688 | PB     |
| Franklin Furnace, OH | 391450020 | 38.60934 | -82.8225 | PB     |
| Franklin Furnace, OH | 391450021 | 38.60066 | -82.8296 | PB     |
| Franklin Furnace, OH | 391450022 | 38.58808 | -82.8348 | PB     |
| Warren, OH           | 391555504 | 41.23506 | -80.8127 | PB     |
| MI                   | 260330901 | 46.49361 | -84.3642 | justB  |
| MI                   | 261110951 | 43.60917 | -84.2106 | justB  |
| MI                   | 261110953 | 43.59139 | -84.2094 | justB  |
| MI                   | 261110955 | 43.58944 | -84.2211 | justB  |
| MI                   | 261110959 | 43.57419 | -84.3216 | justB  |
| MI                   | 261630015 | 42.30279 | -83.1065 | justB  |
| Dearborn, MI         | 261630033 | 42.30754 | -83.1496 | PB     |
| MI                   | 261635502 | 42.35059 | -83.0524 | just B |
| Liberty, PA          | 420030064 | 40.32377 | -79.8681 | PB     |
| Clairton, PA         | 420033007 | 40.29434 | -79.8853 | PB     |
| Kennedy Township, PA | 420035503 | 40.49435 | -80.0964 | PB     |
| PA                   | 420450002 | 39.83556 | -75.3725 | justB  |
| PA                   | 420710007 | 40.04667 | -76.2833 | justB  |
| PA                   | 420770004 | 40.61194 | -75.4325 | justB  |
| PA                   | 420910005 | 40.19255 | -75.4575 | justB  |
| PA                   | 421010004 | 40.00889 | -75.0978 | justB  |
| PA                   | 421010014 | 40.04962 | -75.2408 | justB  |
| PA                   | 421010047 | 39.94465 | -75.1652 | justB  |
| PA                   | 421010055 | 39.92287 | -75.1869 | justB  |
| PA                   | 421010063 | 39.88294 | -75.2197 | justB  |
| PA                   | 421010136 | 39.9275  | -75.2228 | justB  |
| PA                   | 421190001 | 40.95517 | -76.8819 | justB  |
| PA                   | 421250005 | 40.14667 | -79.9022 | justB  |
| PA                   | 420010001 | 39.92002 | -77.3097 | justB  |
| PA                   | 420030031 | 40.44337 | -79.9903 | justB  |
| Philadelphia, PA     | 421010449 | 39.9825  | -75.0831 | justP  |
| Buffalo, NY          | 360291013 | 42.98844 | -78.9186 | PB     |
| Rochester, NY        | 360551007 | 43.1462  | -77.5481 | PB     |
| NY                   | 360050133 | 40.8679  | -73.8781 | justB  |
| NY                   | 360095501 | 42.08506 | -78.4336 | justB  |
| NY                   | 360291007 | 42.7273  | -78.8498 | justB  |
| NY                   | 360291014 | 42.99813 | -78.8993 | justB  |
| NY                   | 360310003 | 44.39308 | -73.8589 | justB  |
| NY                   | 360470118 | 40.69545 | -73.9277 | justB  |
| NY                   | 360610115 | 43.84955 | -79.9357 | justB  |

|                             |           |          |          |       |
|-----------------------------|-----------|----------|----------|-------|
| NY                          | 360632008 | 43.08218 | -79.0011 | justB |
| NY                          | 360810124 | 40.73614 | -73.8216 | justB |
| NY                          | 360831003 | 42.73194 | -73.6891 | justB |
| NY                          | 360850111 | 40.58027 | -74.1983 | justB |
| NY                          | 360850132 | 40.58056 | -74.1518 | justB |
| NY                          | 361030009 | 40.82799 | -73.0575 | justB |
| New York, NY                | 360050110 | 40.81616 | -73.9021 | PB    |
| CT                          | 90019003  | 41.11833 | -73.3367 | justB |
| CT                          | 90031003  | 41.78472 | -72.6317 | justB |
| CT                          | 90090027  | 41.3014  | -72.9029 | justB |
| DE                          | 100031008 | 39.5778  | -75.6107 | justB |
| DE                          | 100032004 | 39.73944 | -75.5581 | justB |
| NJ                          | 340155501 | 39.83709 | -75.244  | justB |
| NJ                          | 340210005 | 40.28309 | -74.7427 | justB |
| NJ                          | 340230006 | 40.47282 | -74.4224 | justB |
| NJ                          | 340230011 | 40.46218 | -74.4294 | justB |
| NJ                          | 340273001 | 40.78763 | -74.6763 | justB |
| NJ                          | 340390004 | 40.64144 | -74.2084 | justB |
| NJ                          | 340395502 | 40.65205 | -74.1999 | justB |
| MD                          | 240053001 | 39.31083 | -76.4744 | justB |
| MD                          | 240330030 | 39.05528 | -76.8783 | justB |
| MD                          | 245100006 | 39.34056 | -76.5822 | justB |
| MD                          | 245100040 | 39.29806 | -76.6047 | justB |
| Washington, DC              | 110010043 | 38.92185 | -77.0132 | PB    |
| Providence, RI              | 440070022 | 41.80795 | -71.415  | PB    |
| RI                          | 440030002 | 41.61524 | -71.72   | justB |
| RI                          | 440070026 | 41.87467 | -71.38   | justB |
| RI                          | 440071010 | 41.84157 | -71.3608 | justB |
| NH                          | 330110020 | 42.99578 | -71.4625 | justB |
| NH                          | 330111011 | 42.71866 | -71.5224 | justB |
| NH                          | 330115001 | 42.86175 | -71.8784 | justB |
| NH                          | 330150014 | 43.07533 | -70.748  | justB |
| MA                          | 250092006 | 42.47464 | -70.9708 | justB |
| MA                          | 250130008 | 42.19438 | -72.5551 | justB |
| MA                          | 250213003 | 42.21177 | -71.114  | justB |
| MA                          | 250250041 | 42.31737 | -70.9684 | justB |
| Boston, MA                  | 250250042 | 42.32944 | -71.0825 | PB    |
| Northbrook, IL              | 170314201 | 42.14    | -87.7992 | PB    |
| O'Hare airport, Chicago, IL | 170313103 | 41.96519 | -87.8763 | justB |
| Underhill, VT               | 500070007 | 44.52839 | -72.8688 | PB    |
| VT                          | 500070014 | 44.4762  | -73.2106 | justB |
| VT                          | 500210002 | 43.60806 | -72.9828 | justB |

|                  |           |          |           |       |
|------------------|-----------|----------|-----------|-------|
| East Chicago, IN | 180895503 | 41.64921 | -87.4475  | PB    |
| Gary, IN         | 180895504 | 41.5997  | -87.3443  | PB    |
| IN               | 180190009 | 38.27668 | -85.7638  | justB |
| IN               | 180855502 | 41.23898 | -85.8321  | justB |
| IN               | 180890022 | 41.60668 | -87.3047  | justB |
| IN               | 180890023 | 41.65274 | -87.4396  | justB |
| IN               | 180890030 | 41.6814  | -87.4947  | justB |
| IN               | 180970078 | 39.8111  | -86.1145  | justB |
| IN               | 180970084 | 39.75885 | -86.1154  | justB |
| IN               | 181270024 | 41.61756 | -87.1993  | justB |
| IN               | 181570008 | 40.43164 | -86.8525  | justB |
| IN               | 181630016 | 37.97444 | -87.5323  | justB |
| Follansbee, WV   | 540095501 | 40.33564 | -80.5953  | PB    |
| WV               | 540390010 | 38.3456  | -81.6283  | justB |
| WV               | 540610003 | 39.64937 | -79.9209  | justB |
| WV               | 540690010 | 40.11488 | -80.701   | justB |
| Richmond, VA     | 510870014 | 37.55655 | -77.4004  | PB    |
| VA               | 510330001 | 38.20087 | -77.3774  | justB |
| VA               | 510590030 | 38.77335 | -77.1047  | justB |
| VA               | 516700010 | 37.28962 | -77.2918  | justB |
| VA               | 518100008 | 36.84188 | -76.1812  | justB |
| OH               | 391450020 | 38.60934 | -82.82251 | N/A   |
| OH               | 391450021 | 38.60066 | -82.82964 | N/A   |

## Appendix B: Gas-particle partitioning analysis

### Appendix B.1 Junge-Pankow partitioning description and why it wasn't used in GEM-MACH-PAH

Junge-Pankow partitioning (JP) is based on Langmuir adsorption (Langmuir, 1918). It expresses partitioning as a particulate fraction  $\phi_k$  for each PAH species, k:

$$\phi_k = \frac{c\theta}{p_{L,k}^o + c\theta} \quad , \quad (\text{B.1.1})$$

where  $\phi_k$  is equal to the particulate concentration divided the total PAH species concentration. When  $\phi_k = 1$ , all of the concentration is in the particle phase, and none is in the gas phase, while  $\phi_k = 0$  means all of the PAH is in the gas phase.  $\theta$  is the total dry aerosol-particle surface area ( $\text{m}^2$ ), which are treated as spherical,  $p_{L,k}^o$  is the subcooled liquid saturated vapor pressure per PAH species, and  $c$  is a constant that depends on the PAH species and the temperature (Junge, 1977).

The vapor pressure is calculated using the relation:

$$\log K_{p,k} = m_K \log p_{L,k}^o + b_K \quad (\text{B.1.2})$$

where  $m_{p,k}$  and  $b_{p,k}$  come from Offenberg and Baker (1999)'s supporting information for PAHs.

Figure B.1b shows sample plots of  $\phi_k$  vs  $\log p_{L,k}^o$ . These examples show how the measurements (blue crosses) differ from the JP model (purple points and black line), which requires that  $m_K = -1$  (see next section for the derivation of this). The JP formulation does not allow for improvement given the  $m_K = -1$  constraint. Therefore, the Dachs-Eisenreich formulation is examined next.

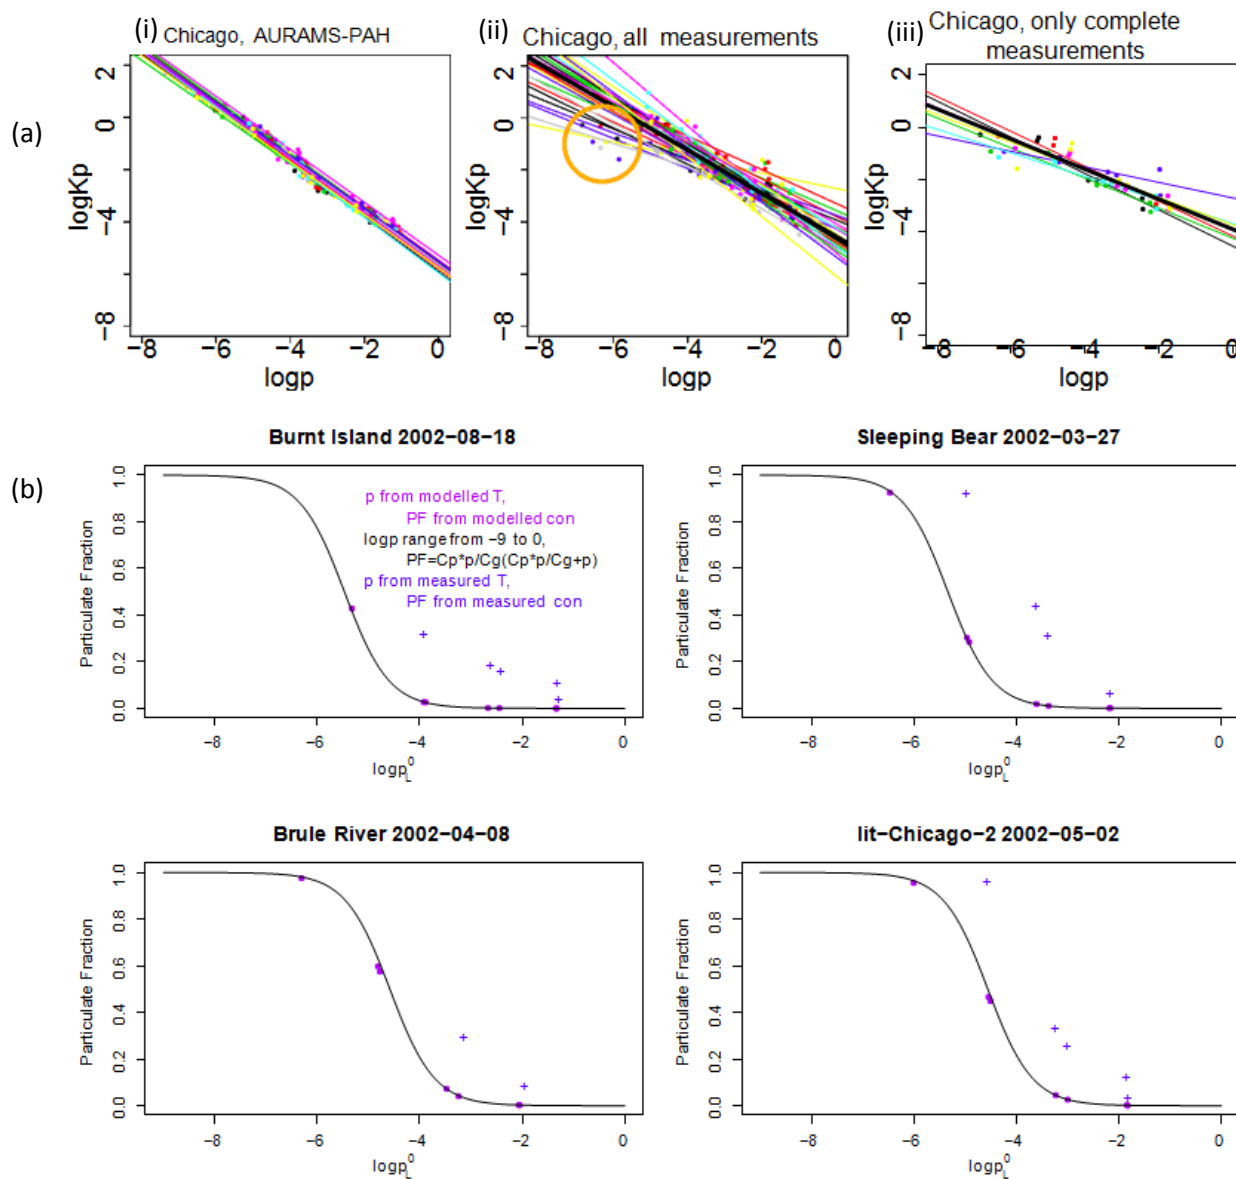

**Figure B.1:** (a) Chicago (taken as example) modelled (from AURAMS-PAH) and measured  $\log Kp$  vs  $\log p^\circ$  for all 7 PAHs, and their linear fits for 2002 data. Thick black line indicates the median linear fit. a(i) original JP and DE partitioning scheme, a(ii) all measurements, a(iii): only those measurements where all 7 PAHs were measured. (b) Particulate fraction ( $\phi$ ) vs  $\log p_L^\circ$  for AURAMS-PAH model and 2002 measurement samples from four sites. The Junge-Pankow model is shown for 7 PAH species in purple points, and Eq. (B.1.1) as a black line. The measurements are shown as blue crosses.

## Appendix B: Derivation of $m = -1$ for JP formulation, starting with Eq. (B.1.1)

Junge-Pankow relationship:

$$\phi = \frac{C_p}{C_p + C_g} = \frac{c\theta}{c\theta + p_L^\circ} \quad (\text{B1})$$

$$\frac{C_p + C_g}{C_p} = \frac{c\theta + p_L^\circ}{c\theta} \quad (\text{B2})$$

$$1 + \frac{C_g}{C_p} = 1 + \frac{p_L^\circ}{c\theta} \quad (\text{B3})$$

$$\frac{C_g}{C_p} = \frac{p_L^\circ}{c\theta} \quad (\text{B4})$$

$$\frac{C_p}{C_g} = \frac{c\theta}{p_L^\circ} \quad (\text{B5})$$

$$(\text{B6})$$

But,

$$\theta = C_{SSA} \left( \frac{m^2}{\mu g} \right) C_{TSP} \left( \frac{\mu g}{m^3} \right) \quad (\text{B7})$$

Subbing in:

$$\frac{C_p}{C_g} = \frac{cC_{SSA}C_{TSP}}{p_L^\circ} \quad (\text{B8})$$

$$\frac{C_p/C_{TSP}}{C_g} = K_p = \frac{cC_{SSA}}{p_L^\circ} \quad (\text{B9})$$

$$(\text{B10})$$

Take log of both sides:

$$\log \left( \frac{C_p/C_{TSP}}{C_g} \right) = \log(cC_{SSA}) - \log(p_L^\circ) \quad (\text{B11})$$

$$= -1 \log(p_L^\circ) + \log(cC_{SSA}) \quad (\text{B12})$$

Thus, for JP to be in a format that fits  $\log K_p = m \log p_L^\circ + b$ ,  $m$  can only be  $-1$ .



## Appendix B.2: How the Dachs-Eisenreich parameters were changed based on empirical evidence

The Dach-Eisenreich expression for  $K_p$  is:

$$\begin{aligned} K_{p,k} &= 10^{-12} \left( \frac{1.5 f_{OC}}{\rho_{oct}} K_{OA,k} + f_{EC} K_{SA,k} \right) \\ &= 10^{-12} f_{EC} K_{SA,k} + 1.5 \times 10^{-12} \frac{f_{OC}}{\rho_{oct}} K_{OA,k} \end{aligned} \quad (\text{B.2.1})$$

where  $f_{OC}$  and  $f_{EC}$  are the organic and elemental carbon fractions respectively,  $\rho_{oct}$  is the density of octanol, the octanol-air partitioning coefficient,  $K_{OA,k}$ , is related to temperature:

$$K_{OA,k} = 10^{\frac{m_{OA,k}}{T} + b_{OA,k}} \quad (\text{B.2.2})$$

where  $m_{OA,k}$  and  $b_{OA,k}$  are taken from Odabasi et al (2006), and the soot-air partitioning coefficient,  $K_{SA,k}$ , is related to the soot-water and air-water partitioning coefficients:

$$\begin{aligned} K_{SA,k} &= K_{SW,k} e^{-K_{AW,k}} \\ &= K_{SW,k} e^{-\left(\frac{m_{AW,k}}{T} + b_{AW,k}\right)}, \end{aligned} \quad (\text{B.2.3})$$

where  $m_{AW,k}$  and  $b_{AW,k}$  are from Sander (1999) and Bamford et al (1999). An update for  $b_{AW,k}$  was calculated from the 25°C  $K_{AW,k}$  values given in Ma et al (2010) using Eq. (B.2.3).  $K_{OA,k}$  and  $\rho_{oct}$  are also well-known, and make the second term in Eq. (B.2.1) four orders of magnitude smaller than the first term. The  $K_{SW,k}$  values (in Eq. (B.2.3)) are highly uncertain. Using our new AURAMS-PAH model-measurement comparisons, we have determined new  $K_{SW,k}$  values that would improve the DE particulate fraction representation.

Fig. B.1a shows  $\log K_{p,k}$  vs  $\log p_{L,k}$  for each 2002 Chicago measurement sample (of multiple PAH species) in the Galarneau et al (2014) study (these are measurements of up to 7 PAH species in the gas and particle phases, thus for each PAH, the gas-particle partitioning coefficient ( $K_p$  can be plotted against that PAH's vapour pressure), and their linear fits. Eq. (B.1.2) governs the data relationship, but the observations have more spread in slope than the AURAMS-PAH model is capable of representing (shown in Figure B.1a). Using the JP or DE formulation, the model can not represent the variability in the slope, however, unlike the JP formulation, the DE model slope ( $m_K$ ) can be altered to better match observations. The modeled slope, at -1, was too steep compared to the measurements (Fig. B.1a (i) vs. (ii) and (iii)). Note that most of the measured samples did not have BaP measurements, as this species is difficult to measure unless its concentrations are high. Therefore, the median line from the fits that include all samples (thick

black line in Fig. B.1a(ii)) does not represent BaP measurements well. BaP points tend to fall well below the median line (see circle in Fig. B.1a(ii)). Therefore, we selected only samples that had all seven PAHs measured (from all sites -- shown in Fig. B.1a(iii) for Chicago samples), and calculated a median line from these linear fits. This median line better represents the slope and intercept of all PAHs, including BaP. Chicago was shown as an example, however, the original modelled slopes for all sites were too steep (too negative), and the intercepts too low.

Therefore, to adjust  $K_{SW,k}$ , we utilize the median  $m_k$  and  $b_k$  from the 2002 North American measurements, described above. First, we substitute Eq. (B.1.2) into Eq. (1) to get:

$$\begin{aligned}\log K_{p,k} &= m_K \left( \frac{m_{p,k}}{T} + b_{p,k} \right) + b_K \\ &= \frac{m_K m_{p,k}}{T} + m_K b_{p,k} + b_K\end{aligned}\quad (\text{B.2.4})$$

Fig. 2a shows the all-site (2002) ensemble of AURAMS-PAH model-over-measured  $\log K_p$  and (b) particulate fraction, in green. The "adjusted model" -- which is actually just a recalculation of  $\log K_p$  from Eq. (B.2.4), using AURAMS-PAH temperature and the median measured  $m_K$  and  $b_K$  -- is plotted in purple.

We then substitute Eq. (B.2.3) into Eq. (B.2.1), dropping the second term in equation (B.2.1) because we have verified that it is negligible, and because doing so greatly simplifies the math, to get:

$$K_{p,k} = 10^{-12} f_{EC} K_{SW,k} e^{-\left(\frac{m_{AW,k}}{T} + b_{AW,k}\right)} \quad (\text{B.2.5})$$

We set the right-hand-side of Eq. (B.2.4) equal to the log of  $K_{p,k}$  from Eq. (B.2.5) to get our new  $K_{SW,k}$  expression:

$$K_{SW,k} = \frac{10^{\left(\frac{m_K m_{p,k}}{T} + m_K b_{p,k} + b_K + 12\right)}}{f_{EC} e^{-\left(\frac{m_{AW,k}}{T} + b_{AW,k}\right)}} \quad (\text{B.2.6})$$

Eq. (B.2.6) is thus a means of describing PAH partitioning based on measurements, and the resulting  $K_{SW,k}$  values are summarized in Table 1. The new  $K_{SW,k}$  values will go into equation B.2.3 to give new  $K_{SA,k}$  values that will go into equation B.2.1, which does the PAH partitioning in the model.

## Appendix C: Verification of PAH mobile EFs from literature and SPECIATE sources

We require total PAH (gas + particle phases) emissions for our model, however about half of the compiled EFs (from the literature and from SPECIATE) only reported EFs for the particulate component of total PAH. Therefore, the EFs from those studies could not be used. The remaining SPECIATE data contained values that were sometimes unrealistically high (e.g., up to 20% phenanthrene in the TOG mass, which is orders of magnitude larger than typical values), and the relevant databases and reports lacked explanations for these anomalies. Therefore, none of the SPECIATE EFs were used in our determination of new PAH emissions.

From the remaining publications, the on-road EFs we recorded fell into the eight vehicle categories mentioned above (e.g., LDGV (Lim et al., 2007; de Abrantes et al., 2009); LDDV (Karavalakis et al., 2011); LDDT (Westerholm et al., 2001; Nelson et al., 2008); HDDV (Mi et al., 2000; Lim et al., 2005; Nelson et al., 2008); and MC (Yang et al., 2005; Spezzano et al., 2008)). When the EFs were converted to units of mass PAH per mass TOG for each of the vehicle classes, it was found that for some species/vehicle classes the EFs spanned up to two orders of magnitude within the same study, and up to three orders of magnitude across different studies. The EFs differ greatly within each category because the studies examined report on emissions from a variety of fuels (e.g., diesel can have varying percentages of biodiesel added), driving speeds (e.g., idling, city driving, highway driving, etc), and temperatures (e.g., cold start, cold outdoor temperatures, warm engine, etc.), whereas the TOG values that the PAHs were normalized to were only reported for different types of roads (e.g., urban, highway). When publications reported EFs for multiple fuel types, the most relevant EFs were kept (e.g., in Canada only ultralow sulfur diesel (ULSD), and unleaded gasoline fuels are used).

With these updated PAH EFs in hand, SMOKE was run to generate gridded emissions files of 28 usual GEM-MACH emitted species plus benzene and seven gas-phase PAHs on two model grids, a continental grid with 10-km horizontal grid spacing (Fig. 1a) and the "Pan Am" grid with 2.5-km grid spacing (Fig. 1b). We then ran the model with both the "recent-literature-based" EFs for eight vehicle classes (using the median value in each category) and with MOVES 2014 EFs for just two classes (gasoline and diesel). The literature based EFs were generally higher than those from MOVES. The model biases for PAHs were smaller with the MOVES EFs in both Canada and the U.S., therefore, the model results we show in Section 4 are from the simulation with MOVES mobile emissions. We will discuss the results of the on-road mobile EFs further when we analyze the model output (Section 4.2.1).

## Appendix D: Table of species-specific constants used in the model for dry and wet removal.

**Table D.1:** Species-specific constants used in the model for dry and wet scavenging.

| Constant                            | Benzen<br>e | PHEN     | ANTH     | FLRT     | PYR      | BaA      | CHRY     | BaP      | Source                                                             |
|-------------------------------------|-------------|----------|----------|----------|----------|----------|----------|----------|--------------------------------------------------------------------|
| <sup>1</sup> $\alpha$               | 0.05        | 0.1      | 0.1      | 0.2      | 0.2      | 0.2      | 0.2      | 0.3      | Zhang et al (2015)                                                 |
| <sup>2</sup> $\beta$                | 0.1         | 0.3      | 0.3      | 0.4      | 0.4      | 0.5      | 0.5      | 0.6      | Zhang et al (2015)                                                 |
| <sup>3</sup> H*<br>(unit)           | 22.7        | 22.7     | 20.2     | 70.1     | 76.8     | 146      | 227      | 91.1     | Staudinger & Roberts (2001) for benzene. Ma et al. (2010) for PAHs |
| <sup>4</sup> $f_0$<br>(unit)        | 0           | 0        | 0        | 0        | 0        | 0        | 0        | 0        | NA                                                                 |
| <sup>5</sup> ats<br>(K)             | 3950        | 4700     | 4000     | 6900     | 6900     | 4700     | 4700     | 2405     | Sander (1999)                                                      |
| <sup>6</sup> vap.<br>pres.<br>slope | -1211.03    | -3706.04 | -3710.87 | -4081.11 | -4153.89 | -4563.27 | -4577.21 | -5046.88 | Shiu and Ma (2000)                                                 |
| <sup>7</sup> vap.<br>pres.<br>Int.  | 6.0299      | 11.42    | 11.42    | 11.59    | 11.62    | 11.81    | 11.82    | 12.04    | Shiu and Ma (2000)                                                 |

<sup>1</sup>weights applied to resistance for SO<sub>2</sub> for a given gas

<sup>2</sup>weights applied to resistance for O<sub>3</sub> for a given gas

<sup>3</sup>Henry's law constant, solubility in water

<sup>4</sup>chemical reactivity, used to evaluate how much gas is dissolved in mesophyll

<sup>5</sup>temperature dependency for solubility

<sup>6</sup>sub-cooled liquid saturation vapour pressure (Pa), slope

<sup>7</sup>sub-cooled liquid saturation vapour pressure (Pa), intercept

**Appendix E: Call sequence of MACH (chemistry) part of GEM-MACH-PAH model.**

For the CHEM code, please see <https://zenodo.org/record/1162252#.Wt39IMZII-J>

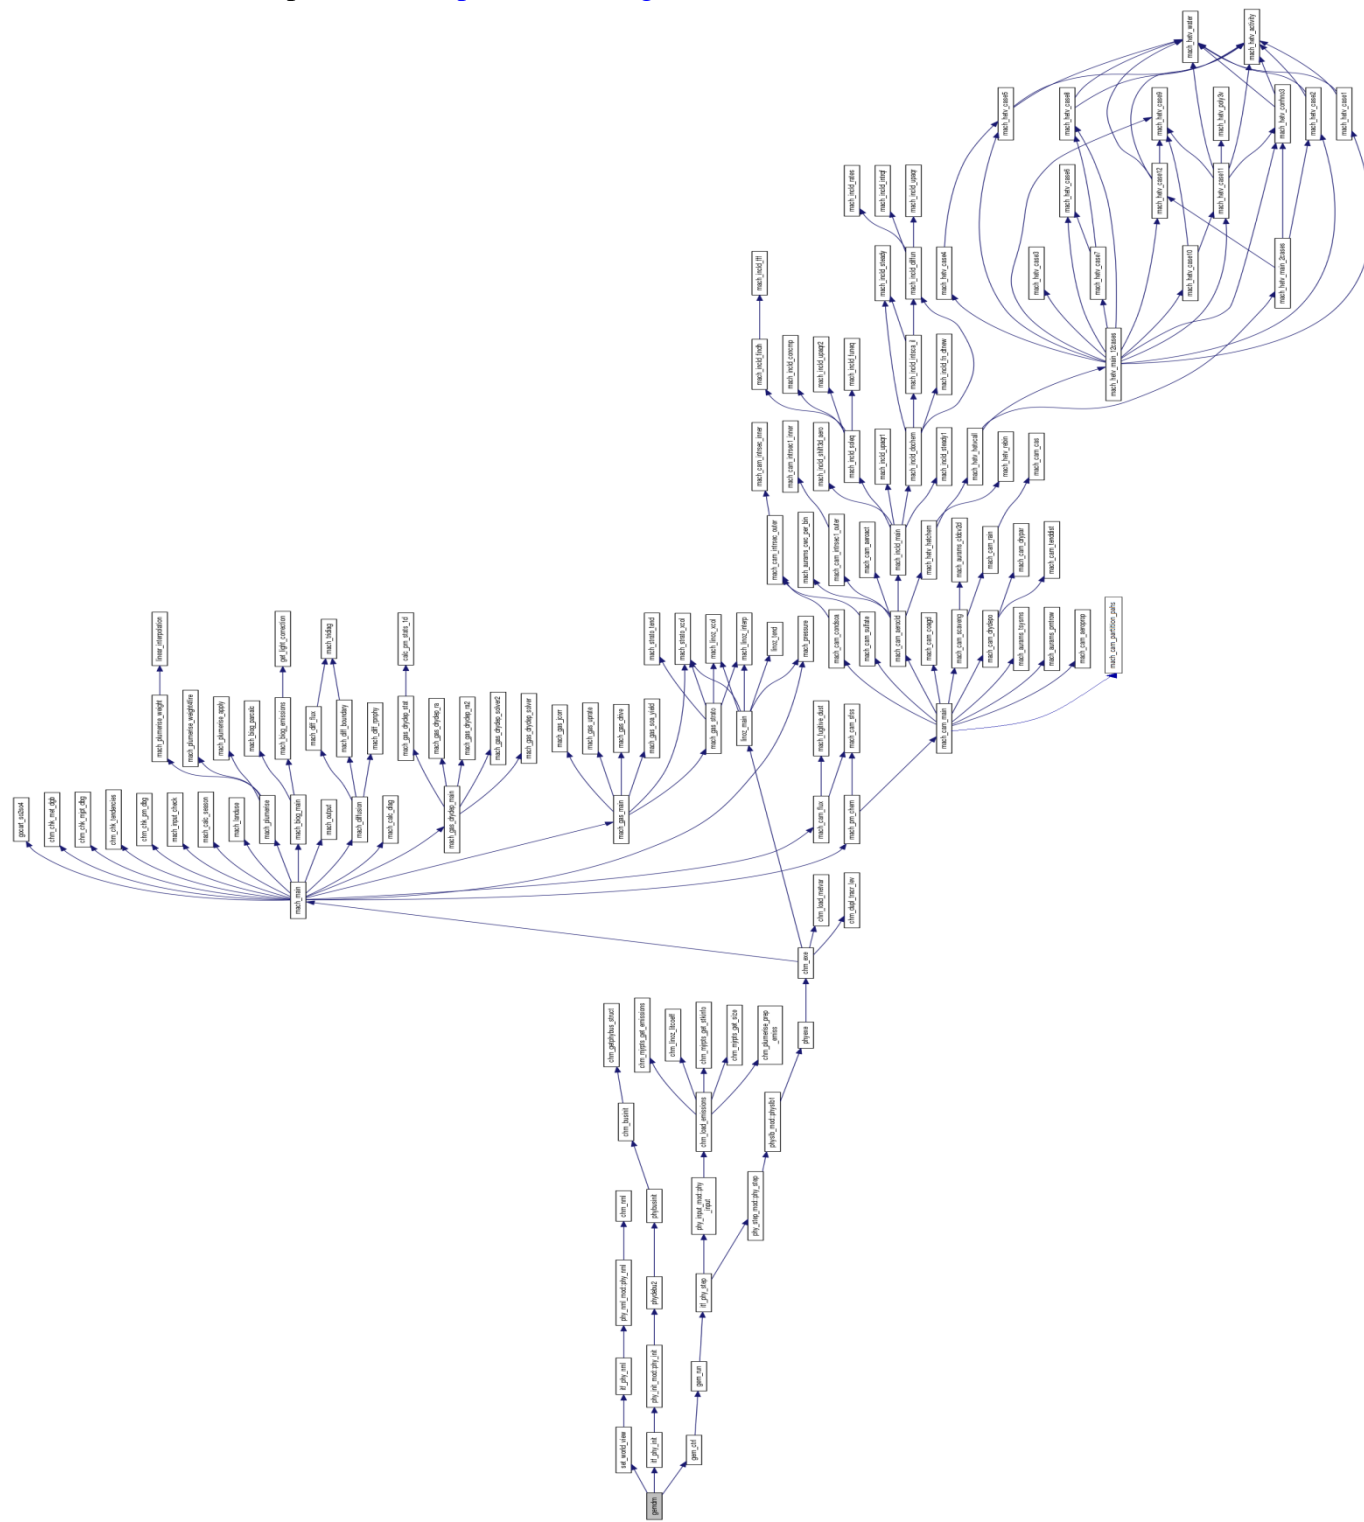

## Appendix F: Hamilton PAH<sub>i</sub>/PM<sub>2.5</sub> analysis

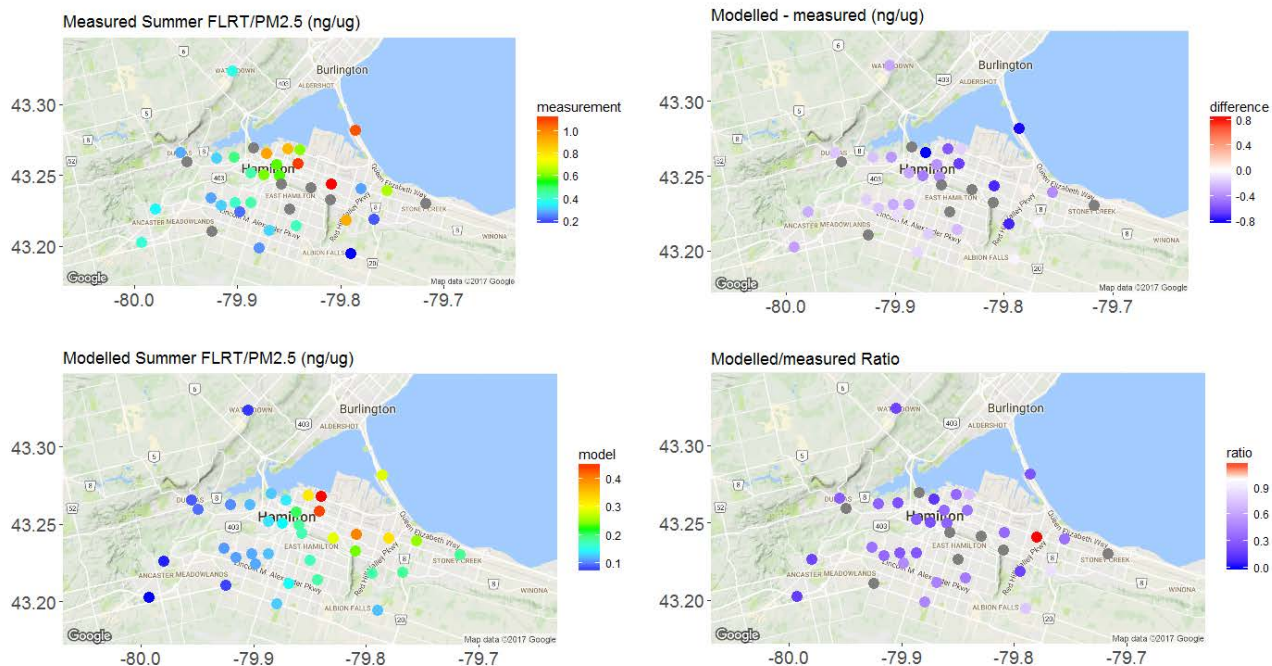

**Figure F.1:** Left: Measured and modelled and concentration ratios of FLRT/PM<sub>2.5</sub> in Hamilton, Ontario for two-week summer 2009 period. Right: Their differences and ratios. Note that spatial pattern in model bias is missing.

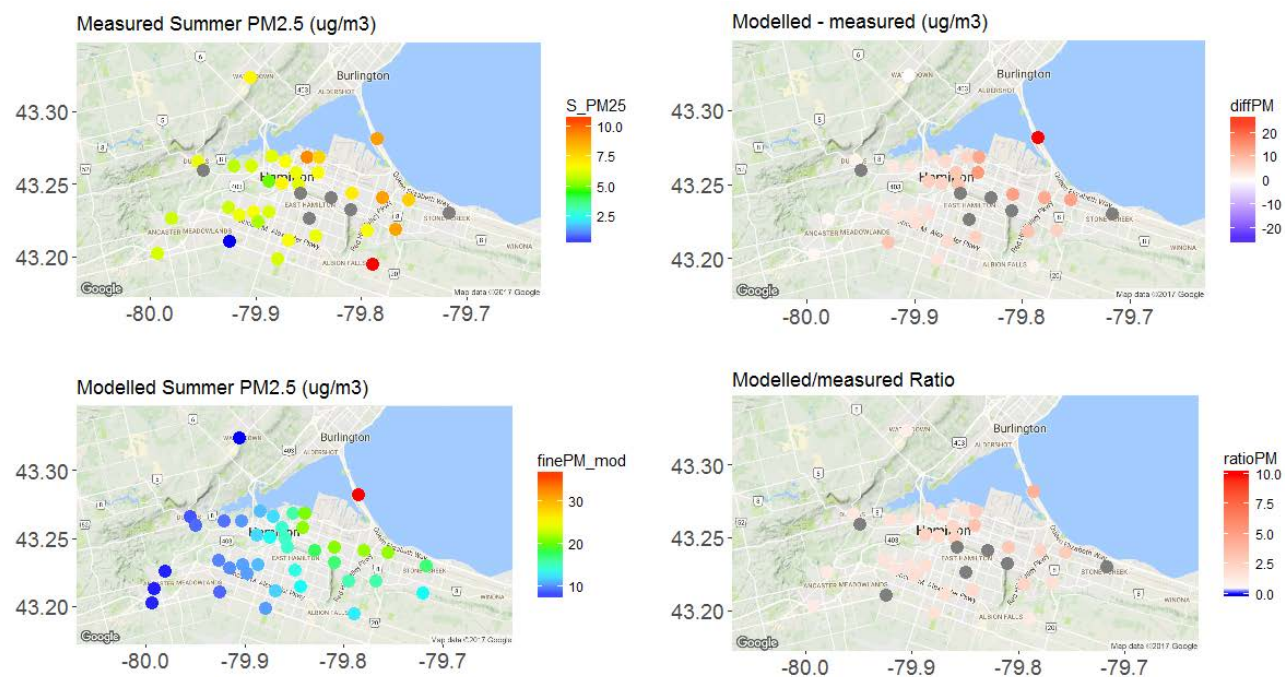

**Figure F.2:** Same as Fig. E.1, but for PM<sub>2.5</sub> concentrations. Note that modelled PM<sub>2.5</sub> is biased high, and is causing the spatial pattern seen in the PAH bias (cf. Fig. 4a).

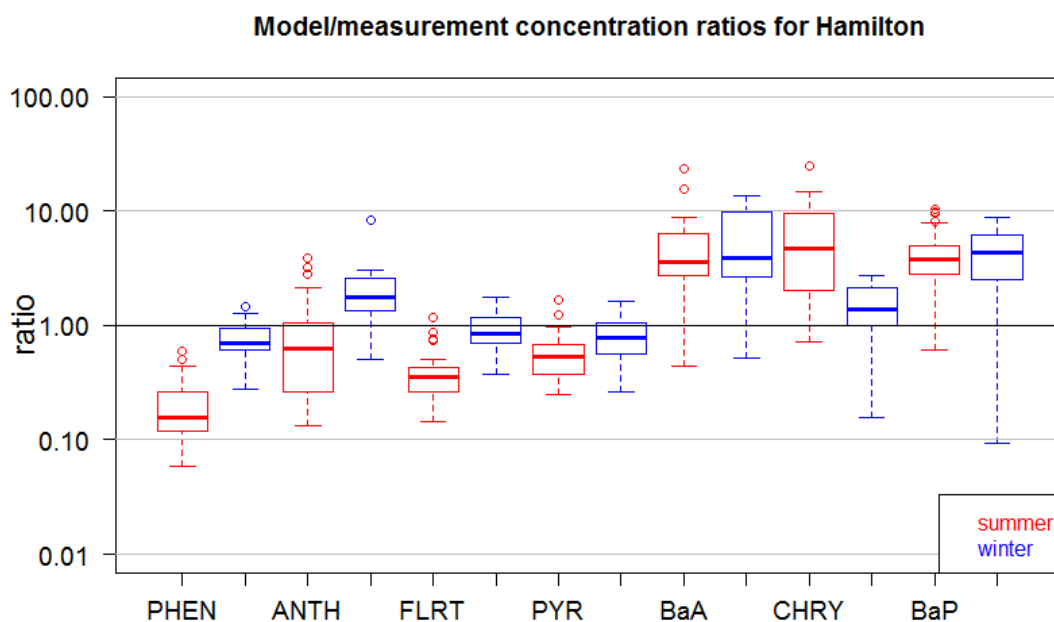

**Figure F.3:** Model/measurement ratios of PAH<sub>i</sub>/PM<sub>2.5</sub> in Hamilton (summer and winter). Note that all biases have shifted down compared to Fig. 5a because the modelled PM<sub>2.5</sub> is biased high compared to measurements.

## References

- Bamford, H. A., Poster, D. L., and Baker, J. E.: Temperature dependence of Henry's Law constants of thirteen polycyclic aromatic hydrocarbons between 4°C and 31°C, *Environ. Toxic. Chem.*, 18, 1905–1912, 1999.
- de Abrantes, R., de Assunção, J. V., Pesquero, C. R., Bruns, R. E., and Nóbrega, R. P.: Emission of polycyclic aromatic hydrocarbons from gasohol and ethanol vehicles, *Atmos. Environ.*, 43, 648–654, doi:10.1016/j.atmosenv.2008.10.014, 2009.
- Galarneau, E., Makar, P. A., Zheng, Q., Narayan, J., Zhang, J., Moran, M. D., Bari, M. A., Pathela, S., Chen, A., and Chlumsky, R.: PAH concentrations simulated with the AURAMS-PAH chemical transport model over Canada and the USA, *Atmos. Chem. Phys.*, 14, 4065–4077, doi:10.5194/acp-14-4065-2014, 2014.
- Junge, C. E.: Basic considerations about trace constituents in the atmosphere as related to the fate of global pollutants, in: *Fate of pollutants in the air and water environments*, edited by Suffet, I. H., pp. 7–25, Wiley, New York, 1977.
- Karavalakis, G., Boutsika, V., Stournas, S., and Bakeas, E.: Biodiesel emissions profile in modern diesel vehicles. Part 2: Effect of biodiesel origin on carbonyl, PAH, nitro-PAH and oxy-PAH emissions, *Sci. Tot. Environ.*, 409, 738–747, doi:10.1016/j.scitotenv.2010.11.010, 2011.

- Langmuir, I.: The adsorption of gases on plane surfaces of glass, mica, and platinum, *J. Am. Chem. Soc.*, 40, 1361–1402, 1918.
- Lim, M. C. H., Ayoko, G. A., Morawaska, L., Ristovski, Z. D., and Jayaratne, E. R.: Effect of fuel composition and engine operating conditions on polycyclic aromatic hydrocarbon emissions from a fleet of heavy-duty diesel buses, *Atmos. Environ.*, 39, 7836–7848, doi:10.1016/j.atmosenv.2005.09.019, 2005.
- Lim, M. C. H., Ayoko, G. A., Morawaska, L., Ristovski, Z. D., and Jayaratne, E. R.: Influence of fuel composition on polycyclic aromatic hydrocarbon emissions from a fleet of in-service passenger cars, *Atmos. Environ.*, 41, 150–160, doi:10.1016/j.atmosenv.2006.07.044, 2007.
- Ma, Y.-G., Lei, Y. D., Xiao, H., Wania, F., and Wang, W.-H.: Critical review and recommended values for the physical-chemical property data of 15 polycyclic aromatic hydrocarbons at 25°C, *J. Chem. Eng. Data*, 55, 819–825, doi:10.1021/je900477x, 2010.
- Mi, H.-H., Lee, W.-J., Chen, C.-B., Yang, H.-H., and Wu, S.-J.: Effect of fuel aromatic content on PAH emission from a heavy-duty diesel engine, *Chemosphere*, 41, 1783–1790, 2000.
- Nelson, P. F., Tibbett, A. R., and Day, S. J.: Effects of vehicle type and fuel quality on real world toxic emissions from diesel vehicles, *Atmos. Environ.*, 42, 5291–5303, doi:10.1016/j.atmosenv.2008.02.049, 2008.
- Odabasi, M., Cetin, E., and Sofuoglu, A.: Determination of octanol-air partition coefficients and supercooled liquid vapor pressures of PAHs as a function of temperature: application to gas-particle partitioning in an urban atmosphere, *Atmos. Environ.*, 40, 6615–6625, doi:10.1016/j.atmosenv.2006.05.051, 2006.
- Offenberg, J. H. and Baker, J. E.: Aerosol size distributions of polycyclic aromatic hydrocarbons in urban and over-water atmospheres, *Environ. Sci. Technol.*, 33, 3324–3331, doi:10.1021/es990089c, 1999.
- Sander, R.: Modeling atmospheric chemistry: interactions between gas-phase species and liquid cloud/aerosol particles, *Surveys in Geophysics*, 20, 1–31, 1999.
- Shiu, W.-Y., Ma, K.-C.: Temperature dependence of physical-chemical properties of selected chemicals of environmental interest. I. Mononuclear and polynuclear aromatic hydrocarbons, *J. Phys. Chem. Ref. Data*, 29, no. 1, 41-130, doi:10.1063/1.556055, 2000.
- Spezzano, P., Picini, P., Cataldi, D., Messale, F., and Manni, C.: Particle- and gas-phase emissions of polycyclic aromatic hydrocarbons from two-stroke, 50-cm<sup>3</sup> mopeds, *Atmos. Environ.*, 42, 4332–4344, doi:10.1016/j.atmosenv.2008.01.008, 2008.
- Staudinger, J., Roberts, P. V.: A critical compilation of Henry's law constant temperature dependence relations for organic compounds, *Chemosphere*, 44, 561-576, doi:10.1016/S0045-6535(00)00505-1, 2001.
- Westerholm, R., Christensen, A., Törnqvist, M., Ehrenberg, L., Rannug, U., Sjögren, M., Rafter, J., Soontjens, C., Almén, J., and Grägg, K.: Comparison of exhaust emissions from Swedish environmental classified diesel fuel (MK1) and European program on emissions, fuels, and engine technologies (EPEFE) Reference fuel: a chemical and biological characterization, with viewpoints on cancer risk, *Environ. Sci. Technol.*, 35, 1748–1754, doi:10.1021/es000113i, 2001.
- Yang, H.-H., Chien, S.-M., Chao, M.-R., and Lin, C.-C.: Particle size distribution of polycyclic aromatic hydrocarbons in motorcycle exhaust emissions, *J. Haz. Mat.*, B125, 154–159, doi:10.1016/j.jhazmat.2005.05.019, 2005.
- Zhang, L., Cheng, I., Muir, D., Charland, J.-P.: Scavenging ratios of polycyclic aromatic compounds



in rain and snow in the Athabasca oil sands region, *Atmos. Chem. Phys.*, 15, 1421-1434, doi: 10.5194/acp-15-1421-2015, 2015.
